# Supplementary material for: Fabrication of a dendrimer-modified boronate affinity material for online selective enrichment of cis-diol-containing compounds and its application in determination of nucleosides in urine
Source: Royal Society of Chemistry journal article supplement (doi:10.1039/c5ra18443f), 2015-01-01
Supplement: c5ra18443f1.pdf [file c5ra18443f1.pdf]

**Fabrication of dendrimer-modified boronate affinity material for  
online selective enrichment of *cis*-diol-containing compounds and its  
application in determination of nucleosides in urine**

**Supplementary data**

Li Gao, Jin Du, Chaozhan Wang, Yinmao Wei\*

*Key Laboratory of Synthetic and Natural Function Molecule Chemistry of Ministry of  
Education, College of Chemistry and Materials Science, Northwest University, Xi'an  
710069, China*

\* Corresponding author: Yinmao Wei

Tel: 86-29-88302604;

Fax: 86-29-88302604;

Email: [ymwei@nwu.edu.cn](mailto:ymwei@nwu.edu.cn)

**Table S1**  
Porous structure parameters.

| sample                    | $S_{\text{BET}}$<br>( $\text{m}^2/\text{g}$ ) | Pore volume<br>( $\text{cm}^3/\text{g}$ ) | Pore size<br>(nm) |
|---------------------------|-----------------------------------------------|-------------------------------------------|-------------------|
| Bare Silica               | 440                                           | 0.48                                      | 7.0               |
| $\text{SiO}_2@\text{dBA}$ | 194                                           | 0.34                                      | 6.8               |

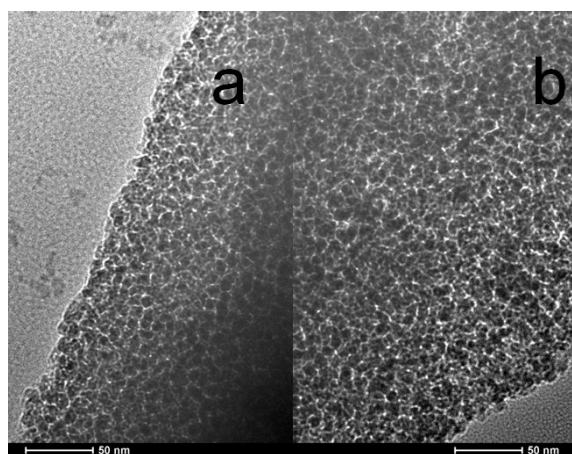

**Figure. S1.** TEM images of (a) bare silica; (b)  $\text{SiO}_2@\text{dBA}$ .

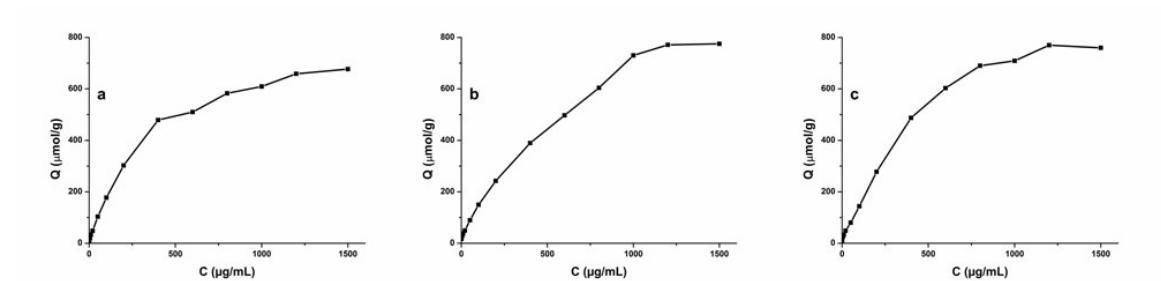

**Figure. S2.** Binding isotherms of (a) catechol; (b) dopamine; (c) adrenaline.
